# Supplementary material for: Ensemble landmarking of 3D facial surface scans
Source: PubMed Central journal article supplement (PMC5758814; doi:10.1038/s41598-017-18294-x), 2018-01-08
Supplement: 41598_2017_18294_MOESM1_ESM.pdf [file 41598_2017_18294_MOESM1_ESM.pdf]

# Ensemble landmarking of 3D facial surface scans - Supplementary information: Heritabilities for all features

Markus A. de Jong<sup>1,2,3</sup>, Pirro Hysi<sup>4</sup>, Tim Spector<sup>4</sup>, Wiro Niessen<sup>5,6</sup>, Maarten J. Koudstaal<sup>1</sup>, Eppo B. Wolvius<sup>1</sup>, Manfred Kayser<sup>3</sup>, and Stefan Böhringer<sup>2,\*</sup>

<sup>1</sup>Department of Oral & Maxillofacial Surgery, Special Dental Care, and Orthodontics, Erasmus MC University Medical Center Rotterdam, Rotterdam, The Netherlands

<sup>2</sup>Department of Medical Statistics and Bioinformatics, Leiden University Medical Center, Leiden, The Netherlands

<sup>3</sup>Department of Genetic Identification, Erasmus MC University Medical Center Rotterdam, Rotterdam, The Netherlands

<sup>4</sup>Department of Twin Research, King's College London, London, United Kingdom

<sup>5</sup>Department of Medical Informatics, Erasmus MC University Medical Center Rotterdam, Rotterdam, The Netherlands

<sup>6</sup>Faculty of Applied Sciences, Delft University of Technology, Delft, The Netherlands

\*correspondence@s-boehringer.org

## ABSTRACT

Supplementary information: Heritabilities for all features

## Supplementary information: Heritabilities for all features

**Table 1.** Heritabilities for all features. *age* effect of age,  $\sigma_1$  residual error,  $\sigma_2$  random effects component.  $h^2$  heritability estimate.  $c_{Z_x}$ ,  $c_{Z_y}$  denote x and y coordinates of landmark Z,  $d_{X_Y}$  denotes the Euclidean distance between landmarks X and Y,  $ar_{X_Y_Z}$  denotes the area defined by the triangle with vertices X, Y, Z, and  $an_{X_Y_Z_T}$  is the angle of triangle X, Y, Z at vertex T with a, b, c corresponding to vertices X, Y, Z, respectively.

| Response | intercept | age   | $\sigma_1$ | $\sigma_2$ | $h^2$ |
|----------|-----------|-------|------------|------------|-------|
| c_1_x    | -43,16    | 0,00  | 1,05       | 1,31       | 0,61  |
| c_1_y    | -0,41     | 0,00  | 1,13       | 0,04       | 0,00  |
| c_1_z    | -0,95     | -0,01 | 1,34       | 0,50       | 0,12  |
| c_2_x    | -32,76    | 0,01  | 1,34       | 1,17       | 0,43  |
| c_2_y    | -0,73     | 0,01  | 1,14       | 0,02       | 0,00  |
| c_2_z    | -0,41     | 0,00  | 1,22       | 0,33       | 0,07  |
| c_3_x    | -17,35    | -0,02 | 0,93       | 0,95       | 0,51  |
| c_3_y    | -0,61     | 0,00  | 0,59       | 0,27       | 0,18  |
| c_3_z    | -0,36     | 0,01  | 0,61       | 0,35       | 0,25  |
| c_4_x    | -30,47    | 0,00  | 1,18       | 1,06       | 0,45  |
| c_4_y    | -0,59     | 0,00  | 0,86       | 0,21       | 0,05  |
| c_4_z    | -0,34     | 0,00  | 0,91       | 0,09       | 0,01  |
| c_5_x    | 6,19      | -0,10 | 0,19       | 0,86       | 0,95  |
| c_5_y    | 6,19      | -0,10 | 0,19       | 0,86       | 0,95  |
| c_5_z    | 6,19      | -0,10 | 0,19       | 0,86       | 0,95  |
| c_6_x    | 6,19      | -0,10 | 0,19       | 0,86       | 0,95  |
| c_6_y    | 6,19      | -0,10 | 0,19       | 0,86       | 0,95  |
| c_6_z    | 6,19      | -0,10 | 0,19       | 0,86       | 0,95  |
| c_7_x    | 6,19      | -0,10 | 0,19       | 0,86       | 0,95  |
| c_7_y    | 6,19      | -0,10 | 0,19       | 0,86       | 0,95  |
| c_7_z    | 6,19      | -0,10 | 0,19       | 0,86       | 0,95  |
| c_12_x   | -16,31    | -0,01 | 0,76       | 1,01       | 0,64  |
| c_12_y   | 0,13      | -0,01 | 0,78       | 0,51       | 0,30  |
| c_12_z   | 0,69      | -0,03 | 1,39       | 1,28       | 0,46  |
| c_13_x   | -12,17    | -0,02 | 0,80       | 0,74       | 0,46  |
| c_13_y   | 0,30      | -0,01 | 1,10       | 0,85       | 0,37  |
| c_13_z   | -0,71     | 0,00  | 1,69       | 0,73       | 0,16  |
| c_14_x   | 6,19      | -0,10 | 0,19       | 0,86       | 0,95  |
| c_14_y   | 6,19      | -0,10 | 0,19       | 0,86       | 0,95  |
| c_14_z   | 6,19      | -0,10 | 0,19       | 0,86       | 0,95  |
| c_17_x   | 6,19      | -0,10 | 0,19       | 0,86       | 0,95  |
| c_17_y   | 6,19      | -0,10 | 0,19       | 0,86       | 0,95  |
| c_17_z   | 6,19      | -0,10 | 0,19       | 0,86       | 0,95  |
| c_18_x   | -24,47    | -0,01 | 1,36       | 1,44       | 0,53  |
| c_18_y   | -0,53     | 0,00  | 1,33       | 0,52       | 0,13  |
| c_18_z   | 0,31      | -0,01 | 1,28       | 0,83       | 0,29  |
| c_19_x   | 6,19      | -0,10 | 0,19       | 0,86       | 0,95  |
| c_19_y   | 6,19      | -0,10 | 0,19       | 0,86       | 0,95  |
| c_19_z   | 6,19      | -0,10 | 0,19       | 0,86       | 0,95  |
| c_21_x   | 6,19      | -0,10 | 0,19       | 0,86       | 0,95  |
| c_21_y   | 6,19      | -0,10 | 0,19       | 0,86       | 0,95  |
| c_21_z   | 6,19      | -0,10 | 0,19       | 0,86       | 0,95  |
| d_1_2    | 17,93     | -0,01 | 1,40       | 0,71       | 0,20  |

*Continued on next page*

| <b>Response</b> | <b>intercept</b> | <b>age</b> | $\sigma_1$ | $\sigma_2$ | $h^2$ |
|-----------------|------------------|------------|------------|------------|-------|
| d.1.3           | 26,43            | -0,02      | 1,44       | 0,56       | 0,13  |
| d.1.4           | 15,69            | -0,01      | 1,44       | 0,55       | 0,13  |
| d.1.5           | 48,37            | -0,01      | 1,47       | 1,29       | 0,43  |
| d.1.6           | 55,09            | 0,00       | 1,45       | 1,64       | 0,56  |
| d.1.7           | 66,93            | 0,01       | 2,26       | 2,50       | 0,55  |
| d.1.8           | 60,75            | 0,02       | 1,51       | 2,23       | 0,69  |
| d.1.9           | 77,30            | -0,01      | 2,16       | 2,33       | 0,54  |
| d.1.11          | 74,18            | 0,00       | 1,82       | 2,37       | 0,63  |
| d.1.12          | 69,58            | 0,03       | 1,64       | 2,09       | 0,62  |
| d.1.13          | 70,18            | 0,03       | 1,49       | 2,03       | 0,65  |
| d.1.14          | 64,28            | 0,02       | 1,84       | 2,17       | 0,58  |
| d.1.15          | 53,07            | 0,01       | 1,59       | 1,77       | 0,55  |
| d.1.16          | 45,18            | 0,03       | 1,61       | 2,21       | 0,65  |
| d.1.17          | 72,55            | 0,07       | 2,17       | 2,63       | 0,59  |
| d.1.18          | 91,10            | 0,07       | 1,89       | 2,78       | 0,69  |
| d.1.19          | 80,36            | 0,07       | 2,52       | 2,57       | 0,51  |
| d.1.20          | 63,91            | 0,09       | 2,15       | 3,05       | 0,67  |
| d.1.21          | 90,88            | 0,03       | 3,10       | 2,48       | 0,39  |
| d.2.3           | 19,29            | -0,04      | 1,57       | 0,98       | 0,28  |
| d.2.4           | 14,68            | -0,02      | 1,65       | 0,05       | 0,00  |
| d.2.5           | 34,47            | -0,01      | 1,31       | 1,22       | 0,47  |
| d.2.6           | 38,61            | 0,00       | 2,14       | 0,00       | 0,00  |
| d.2.7           | 59,89            | 0,00       | 2,44       | 2,71       | 0,55  |
| d.2.8           | 51,35            | 0,00       | 1,77       | 1,87       | 0,53  |
| d.2.11          | 64,79            | -0,01      | 1,95       | 2,08       | 0,53  |
| d.2.12          | 65,12            | 0,02       | 2,08       | 1,91       | 0,46  |
| d.2.13          | 66,87            | 0,02       | 1,71       | 1,82       | 0,53  |
| d.2.14          | 61,68            | 0,01       | 2,16       | 2,14       | 0,50  |
| d.2.15          | 53,62            | 0,00       | 2,01       | 1,58       | 0,38  |
| d.2.16          | 45,94            | 0,02       | 2,45       | 1,96       | 0,39  |
| d.2.17          | 71,90            | 0,07       | 2,68       | 2,71       | 0,51  |
| d.2.18          | 90,68            | 0,06       | 2,17       | 2,86       | 0,64  |
| d.2.19          | 81,63            | 0,06       | 3,04       | 2,64       | 0,43  |
| d.2.20          | 70,88            | 0,08       | 2,52       | 3,08       | 0,60  |
| d.2.21          | 94,17            | 0,01       | 3,46       | 2,58       | 0,36  |
| d.3.4           | 14,08            | -0,01      | 1,34       | 0,42       | 0,09  |
| d.3.5           | 24,14            | 0,01       | 1,12       | 1,23       | 0,55  |
| d.3.6           | 35,55            | 0,01       | 1,78       | 1,11       | 0,28  |
| d.3.7           | 49,94            | 0,02       | 2,55       | 2,58       | 0,51  |
| d.3.11          | 48,05            | 0,02       | 1,65       | 1,92       | 0,58  |
| d.3.12          | 48,01            | 0,05       | 1,55       | 1,87       | 0,59  |
| d.3.13          | 50,62            | 0,05       | 1,10       | 1,78       | 0,72  |
| d.3.14          | 48,16            | 0,04       | 1,66       | 2,30       | 0,66  |
| d.3.15          | 41,49            | 0,03       | 1,31       | 1,59       | 0,59  |
| d.3.16          | 34,33            | 0,05       | 1,83       | 1,96       | 0,53  |
| d.3.17          | 58,80            | 0,09       | 2,18       | 2,68       | 0,60  |
| d.3.18          | 73,62            | 0,09       | 1,82       | 2,80       | 0,70  |
| d.3.19          | 68,46            | 0,09       | 2,50       | 2,66       | 0,53  |
| d.3.20          | 61,02            | 0,09       | 2,26       | 2,81       | 0,61  |

*Continued on next page*

| <b>Response</b> | <b>intercept</b> | <b>age</b> | $\sigma_1$ | $\sigma_2$ | $h^2$ |
|-----------------|------------------|------------|------------|------------|-------|
| d.3.21          | 80,92            | 0,04       | 3,29       | 2,46       | 0,36  |
| d.4.5           | 34,79            | 0,01       | 1,16       | 1,25       | 0,53  |
| d.4.6           | 45,25            | 0,01       | 1,66       | 1,42       | 0,42  |
| d.4.7           | 52,00            | 0,02       | 2,29       | 2,37       | 0,52  |
| d.4.12          | 55,20            | 0,03       | 1,45       | 1,93       | 0,64  |
| d.4.13          | 56,04            | 0,04       | 1,36       | 1,73       | 0,62  |
| d.4.14          | 50,25            | 0,03       | 1,57       | 2,14       | 0,65  |
| d.4.15          | 40,69            | 0,02       | 1,47       | 1,50       | 0,51  |
| d.4.16          | 32,72            | 0,04       | 1,49       | 2,15       | 0,68  |
| d.4.17          | 59,69            | 0,08       | 2,24       | 2,55       | 0,56  |
| d.4.18          | 78,65            | 0,08       | 1,99       | 2,64       | 0,64  |
| d.4.19          | 68,65            | 0,08       | 2,42       | 2,62       | 0,54  |
| d.4.20          | 56,69            | 0,10       | 2,28       | 2,87       | 0,61  |
| d.4.21          | 80,55            | 0,03       | 3,13       | 2,53       | 0,39  |
| d.5.12          | 43,04            | 0,06       | 2,02       | 1,89       | 0,47  |
| d.5.13          | 47,60            | 0,06       | 1,65       | 1,68       | 0,51  |
| d.5.18          | 72,69            | 0,12       | 2,28       | 2,92       | 0,62  |
| d.6.12          | 61,55            | 0,06       | 2,67       | 2,07       | 0,38  |
| d.6.13          | 66,56            | 0,05       | 2,39       | 1,36       | 0,25  |
| d.6.18          | 91,08            | 0,12       | 2,71       | 3,12       | 0,57  |
| d.7.12          | 30,78            | 0,00       | 1,52       | 1,87       | 0,60  |
| d.7.13          | 28,25            | 0,01       | 1,83       | 2,02       | 0,55  |
| d.7.18          | 51,65            | 0,08       | 1,99       | 2,47       | 0,61  |
| d.12.13         | 7,52             | 0,01       | 1,31       | 0,80       | 0,27  |
| d.12.14         | 19,68            | 0,02       | 1,57       | 1,04       | 0,31  |
| d.12.15         | 28,93            | 0,04       | 1,19       | 1,71       | 0,67  |
| d.12.17         | 26,63            | 0,05       | 1,59       | 1,24       | 0,38  |
| d.12.18         | 29,41            | 0,08       | 2,08       | 1,60       | 0,37  |
| d.12.19         | 35,32            | 0,06       | 1,71       | 1,80       | 0,53  |
| d.12.20         | 49,25            | 0,07       | 1,54       | 2,14       | 0,66  |
| d.12.21         | 47,96            | 0,00       | 3,10       | 1,50       | 0,19  |
| d.13.14         | 14,60            | 0,02       | 1,16       | 1,07       | 0,46  |
| d.13.17         | 19,34            | 0,07       | 1,98       | 1,56       | 0,38  |
| d.13.18         | 26,40            | 0,08       | 2,51       | 2,40       | 0,48  |
| d.13.19         | 28,07            | 0,07       | 2,54       | 1,98       | 0,38  |
| d.13.20         | 43,33            | 0,08       | 2,53       | 2,18       | 0,43  |
| d.13.21         | 41,13            | 0,01       | 3,58       | 1,85       | 0,21  |
| d.14.18         | 35,79            | 0,08       | 2,44       | 2,35       | 0,48  |
| d.17.18         | 31,16            | 0,01       | 1,88       | 1,58       | 0,41  |
| d.18.19         | 28,26            | 0,02       | 1,88       | 2,03       | 0,54  |
| d.18.21         | 30,58            | 0,01       | 1,91       | 2,23       | 0,58  |
| d.1.10          | 86,31            | 0,00       | 2,12       | 2,64       | 0,61  |
| d.2.9           | 65,54            | -0,02      | 2,65       | 2,35       | 0,44  |
| d.3.8           | 34,72            | 0,04       | 1,86       | 1,87       | 0,50  |
| d.4.11          | 60,91            | 0,00       | 2,35       | 2,11       | 0,45  |
| d.5.6           | 19,53            | 0,00       | 2,27       | 1,29       | 0,24  |
| d.5.7           | 41,80            | 0,05       | 2,73       | 2,62       | 0,48  |
| d.5.14          | 47,27            | 0,06       | 2,08       | 2,11       | 0,51  |
| d.5.17          | 59,37            | 0,13       | 2,67       | 2,69       | 0,50  |

*Continued on next page*

| <b>Response</b> | <b>intercept</b> | <b>age</b> | $\sigma_1$ | $\sigma_2$ | $h^2$ |
|-----------------|------------------|------------|------------|------------|-------|
| d.5_19          | 70,86            | 0,12       | 4,07       | 0,00       | 0,00  |
| d.5_21          | 85,20            | 0,06       | 3,59       | 2,75       | 0,37  |
| d.6.7           | 58,97            | 0,05       | 3,16       | 2,48       | 0,38  |
| d.6_14          | 66,59            | 0,06       | 2,79       | 1,86       | 0,31  |
| d.6_17          | 78,58            | 0,13       | 3,03       | 2,87       | 0,47  |
| d.6_19          | 90,17            | 0,12       | 3,30       | 2,92       | 0,44  |
| d.6_21          | 104,60           | 0,05       | 3,90       | 2,84       | 0,35  |
| d.7_14          | 18,86            | 0,01       | 1,80       | 1,29       | 0,34  |
| d.7_17          | 27,78            | 0,10       | 2,22       | 1,85       | 0,41  |
| d.7_19          | 39,64            | 0,08       | 2,59       | 2,52       | 0,49  |
| d.7_21          | 55,27            | 0,00       | 3,60       | 2,78       | 0,37  |
| d.12_16         | 31,66            | 0,03       | 1,51       | 1,87       | 0,61  |
| d.13_15         | 24,43            | 0,05       | 1,71       | 1,55       | 0,45  |
| d.14_17         | 11,58            | 0,09       | 2,38       | 1,98       | 0,41  |
| d.14_19         | 23,65            | 0,08       | 2,81       | 2,28       | 0,40  |
| d.14_21         | 38,98            | 0,01       | 3,29       | 2,97       | 0,45  |
| d.17_19         | 12,29            | -0,01      | 2,13       | 0,67       | 0,09  |
| d.17_21         | 27,88            | -0,09      | 3,48       | 0,34       | 0,01  |
| d.18_20         | 48,77            | 0,02       | 2,69       | 2,87       | 0,53  |
| d.19_21         | 15,54            | -0,07      | 3,24       | 0,10       | 0,00  |
| ar.18_12_10     | 71,15            | 10,58      | 38,39      | 100,00     | 0,87  |
| ar.8_7_5        | 455,48           | 1,60       | 41,90      | 49,52      | 0,58  |
| ar.8_7_12       | 527,87           | 0,60       | 40,85      | 50,10      | 0,60  |
| ar.8_6_5        | 223,06           | -0,01      | 32,88      | 0,10       | 0,00  |
| ar.8_9_6        | 338,75           | -0,51      | 30,56      | 23,24      | 0,37  |
| ar.11_9_10      | 108,45           | -0,17      | 16,72      | 0,47       | 0,00  |
| ar.11_8_9       | 101,68           | -0,26      | 15,17      | 0,00       | 0,00  |
| ar.11_12_10     | 183,00           | 0,21       | 33,96      | 0,00       | 0,00  |
| ar.11_8_12      | 219,16           | 0,19       | 26,07      | 17,62      | 0,31  |
| ar.19_18_21     | 219,28           | -0,89      | 50,19      | 0,00       | 0,00  |
| ar.19_17_18     | 174,71           | -0,10      | 34,23      | 10,97      | 0,09  |
| ar.13_18_12     | 95,57            | 0,23       | 18,39      | 14,45      | 0,38  |
| ar.13_17_18     | 254,17           | 1,38       | 55,73      | 0,00       | 0,00  |
| ar.13_7_12      | 103,92           | -0,03      | 25,34      | 19,25      | 0,37  |
| ar.14_13_7      | 122,52           | 0,35       | 14,82      | 13,30      | 0,45  |
| ar.14_13_17     | 80,06            | 0,90       | 24,92      | 18,90      | 0,37  |
| an.18_12_10_a   | 0,69             | 0,00       | 0,04       | 0,05       | 0,59  |
| an.18_12_10_b   | 2,02             | 0,00       | 0,06       | 0,09       | 0,69  |
| an.18_12_10_c   | 0,43             | 0,00       | 0,04       | 0,04       | 0,50  |
| an.8_7_5_a      | 0,99             | 0,00       | 0,06       | 0,05       | 0,34  |
| an.8_7_5_b      | 0,50             | 0,00       | 0,04       | 0,03       | 0,44  |
| an.8_7_5_c      | 1,65             | 0,00       | 0,06       | 0,05       | 0,34  |
| an.8_7_12_a     | 0,66             | 0,00       | 0,05       | 0,04       | 0,45  |
| an.8_7_12_b     | 0,75             | 0,00       | 0,07       | 0,06       | 0,45  |
| an.8_7_12_c     | 1,74             | 0,00       | 0,12       | 0,00       | 0,00  |
| an.8_6_5_a      | 0,54             | 0,00       | 0,07       | 0,00       | 0,00  |
| an.8_6_5_b      | 0,71             | 0,00       | 0,05       | 0,05       | 0,42  |
| an.8_6_5_c      | 1,89             | 0,00       | 0,07       | 0,05       | 0,34  |
| an.8_9_6_a      | 1,46             | 0,00       | 0,08       | 0,04       | 0,24  |

*Continued on next page*

| <b>Response</b> | <b>intercept</b> | <b>age</b> | $\sigma_1$ | $\sigma_2$ | $h^2$ |
|-----------------|------------------|------------|------------|------------|-------|
| an_8_9_6_b      | 1,17             | 0,00       | 0,08       | 0,04       | 0,17  |
| an_8_9_6_c      | 0,52             | 0,00       | 0,04       | 0,03       | 0,28  |
| an_11_9_10_a    | 1,25             | 0,00       | 0,10       | 0,08       | 0,35  |
| an_11_9_10_b    | 0,98             | 0,00       | 0,09       | 0,07       | 0,34  |
| an_11_9_10_c    | 0,91             | 0,00       | 0,09       | 0,03       | 0,11  |
| an_11_8_9_a     | 1,47             | 0,00       | 0,13       | 0,00       | 0,00  |
| an_11_8_9_b     | 0,86             | 0,00       | 0,10       | 0,03       | 0,07  |
| an_11_8_9_c     | 0,82             | 0,00       | 0,11       | 0,03       | 0,07  |
| an_11_12_10_a   | 2,36             | 0,00       | 0,11       | 0,00       | 0,00  |
| an_11_12_10_b   | 0,25             | 0,00       | 0,04       | 0,02       | 0,21  |
| an_11_12_10_c   | 0,53             | 0,00       | 0,07       | 0,05       | 0,34  |
| an_11_8_12_a    | 1,46             | 0,00       | 0,09       | 0,04       | 0,16  |
| an_11_8_12_b    | 1,26             | 0,00       | 0,08       | 0,04       | 0,23  |
| an_11_8_12_c    | 0,42             | 0,00       | 0,04       | 0,02       | 0,20  |
| an_19_18_21_a   | 1,46             | 0,00       | 0,11       | 0,07       | 0,28  |
| an_19_18_21_b   | 0,52             | 0,00       | 0,10       | 0,02       | 0,05  |
| an_19_18_21_c   | 1,16             | 0,00       | 0,15       | 0,01       | 0,00  |
| an_19_17_18_a   | 1,61             | 0,00       | 0,10       | 0,07       | 0,28  |
| an_19_17_18_b   | 1,13             | 0,00       | 0,07       | 0,08       | 0,55  |
| an_19_17_18_c   | 0,41             | 0,00       | 0,08       | 0,03       | 0,17  |
| an_13_18_12_a   | 1,89             | 0,00       | 0,33       | 0,13       | 0,14  |
| an_13_18_12_b   | 0,24             | 0,00       | 0,03       | 0,03       | 0,46  |
| an_13_18_12_c   | 1,01             | 0,00       | 0,32       | 0,13       | 0,15  |
| an_13_17_18_a   | 1,44             | 0,00       | 0,12       | 0,11       | 0,48  |
| an_13_17_18_b   | 1,02             | 0,00       | 0,08       | 0,09       | 0,55  |
| an_13_17_18_c   | 0,68             | 0,00       | 0,06       | 0,04       | 0,33  |
| an_13_7_12_a    | 1,80             | 0,00       | 0,33       | 0,23       | 0,32  |
| an_13_7_12_b    | 0,24             | 0,00       | 0,06       | 0,04       | 0,31  |
| an_13_7_12_c    | 1,09             | 0,00       | 0,35       | 0,03       | 0,01  |
| an_14_13_7_a    | 2,01             | 0,00       | 0,17       | 0,11       | 0,30  |
| an_14_13_7_b    | 0,66             | 0,00       | 0,12       | 0,06       | 0,22  |
| an_14_13_7_c    | 0,48             | 0,00       | 0,10       | 0,07       | 0,28  |
| an_14_13_17_a   | 1,63             | 0,00       | 0,19       | 0,00       | 0,00  |
| an_14_13_17_b   | 0,66             | 0,00       | 0,11       | 0,09       | 0,44  |
| an_14_13_17_c   | 0,85             | 0,00       | 0,09       | 0,07       | 0,41  |
